# Supplementary material for: LRRK2 mediates tubulation and vesicle sorting from membrane damaged lysosomes
Source: bioRxiv or medRxiv preprint supplement (doi:10.1101/2020.01.23.917252), 2020-01-24

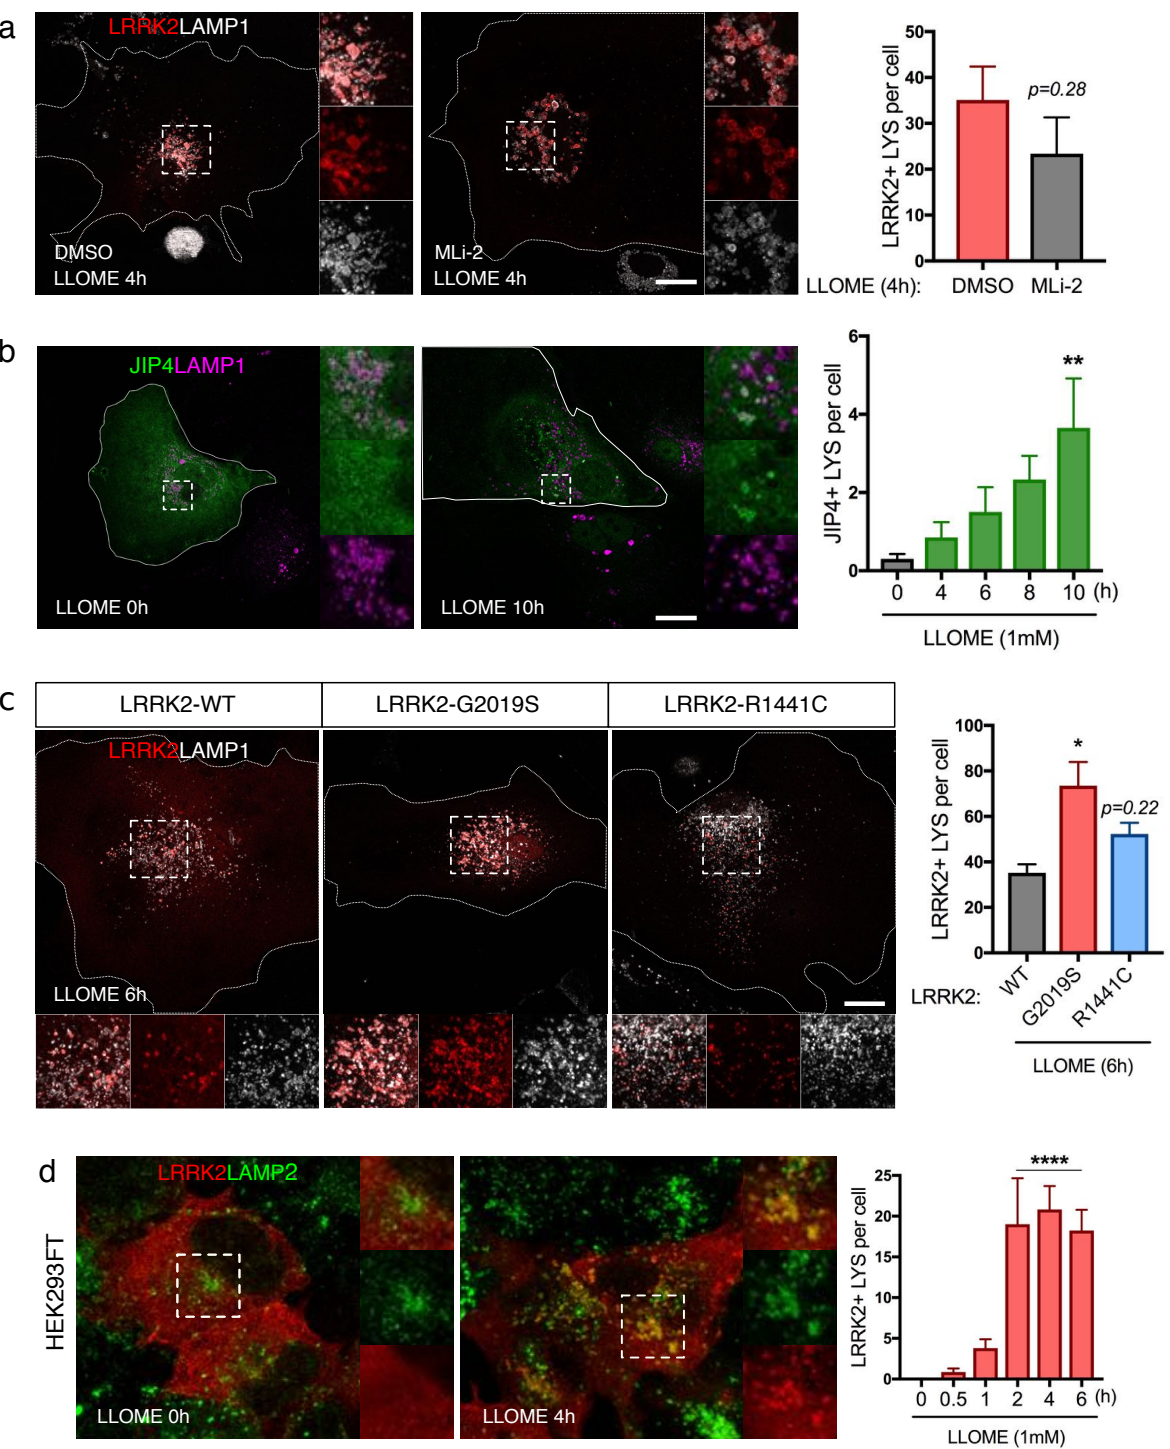

Supplement: Supplementary file [file media-3.pdf]
